# Supplementary material
Source: Research Square preprint supplement (doi:10.21203/rs.3.rs-8956596/v1)
Supplement: Supplementary file 1 [file 1e9b0fd98186100b0a4a4fdf.docx]

***Staphylococcus aureus* PSMα1 amyloid structure is modulated by buffer and salt - Supplementary information**

Emilie Buhl Plechinger1, Kasper Holst Hansen1, Qian Liu1, Ümit Akbey2 and Maria Andreasen1*

1Department of Biomedicine, Aarhus University, Aarhus, Denmark

2Department of Structural Biology, School of Medicine, University of Pittsburgh, Pittsburgh, PA, 15261, USA

**
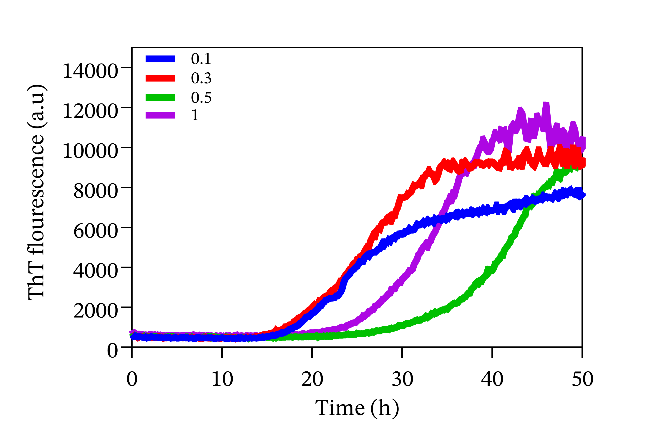

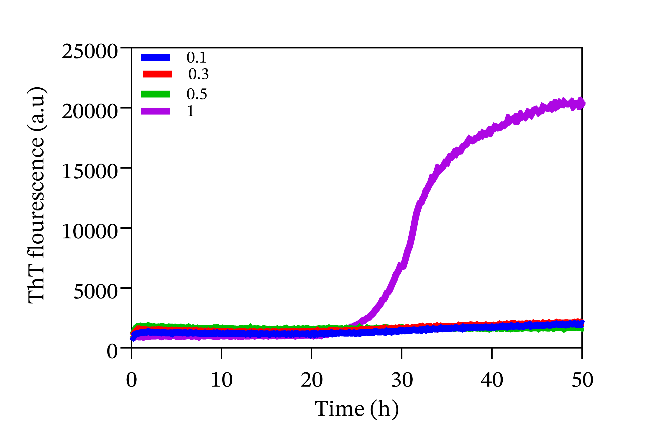

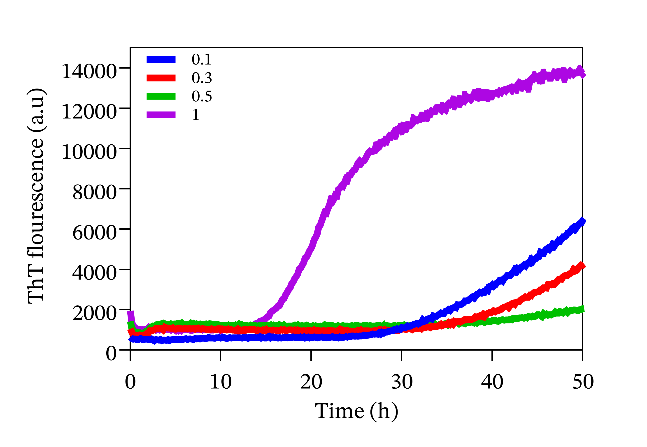

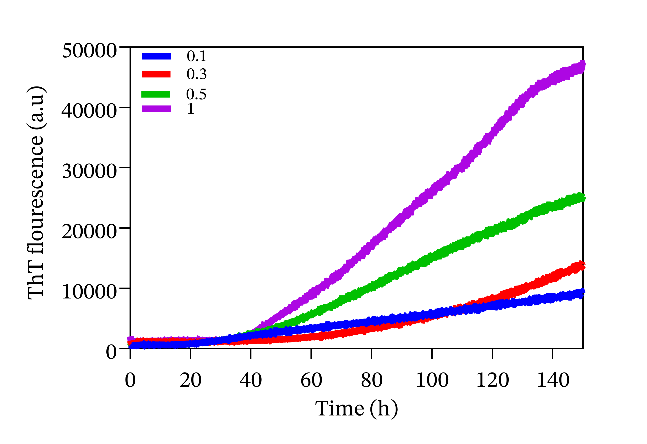
**

**A**

**B**

**D**

**C**

**Figure S1. Solution conditions effect the aggregation kinetics of PSM1.** ThT fluorescence aggregation kinetics of PSM1 peptide in different solutions. (A) MQ-water, (B) KPO4, (C) Tris, and (D) HEPES under quiescent conditions. For each buffer, aggregation was monitored at four different peptide concentrations (0.1, 0.3, 0.5, and 1 mg/mL).

**
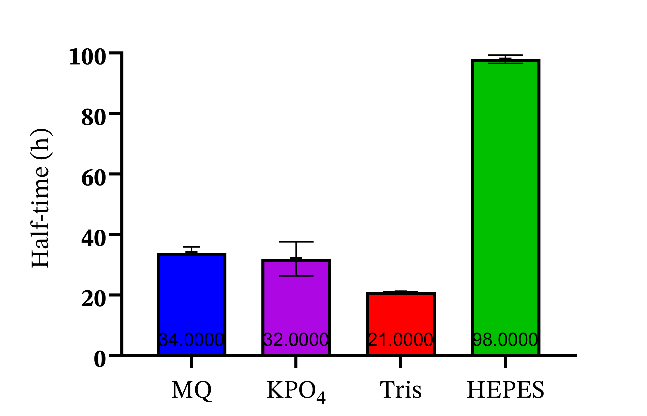

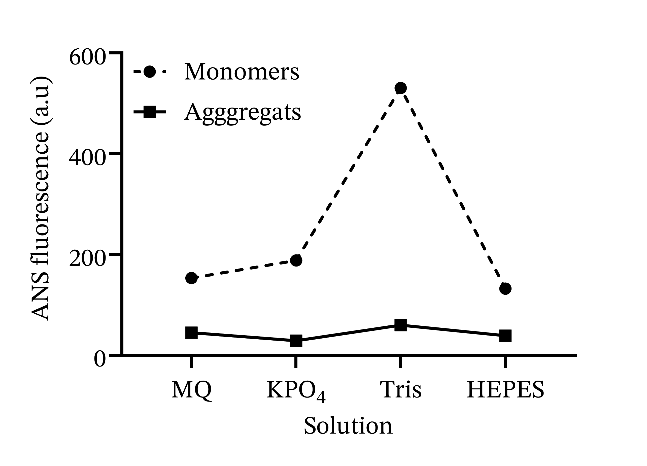
**

**B**

**A**

**Figure S2: Solution-dependent differences in aggregation kinetics and hydrophobic surface exposure of PSM1 fibrils.** (A) Half-time of fibril formation derived from ThT aggregation kinetics in different buffer environments at 1 mg/mL. (B) Peak ANS fluorescence intensity of PSM1 monomers and fibrils formed in different buffer solutions. The dotted line represents the peak intensity of monomers, while the solid line indicates the peak intensity of fibrils under the same conditions.

**
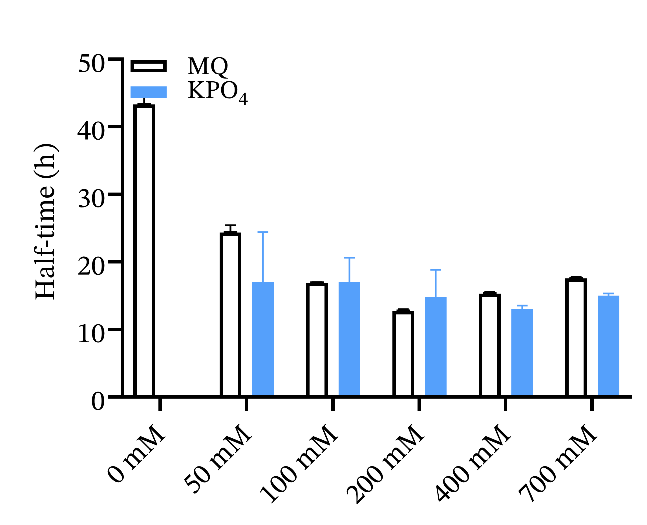
**

**A**

**C**

**B**

**
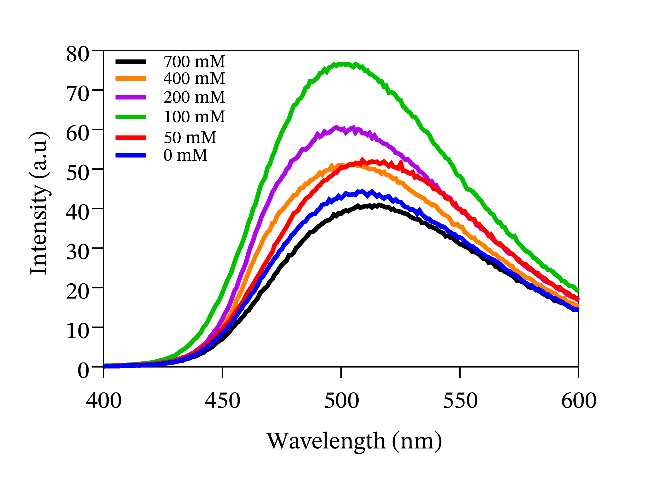

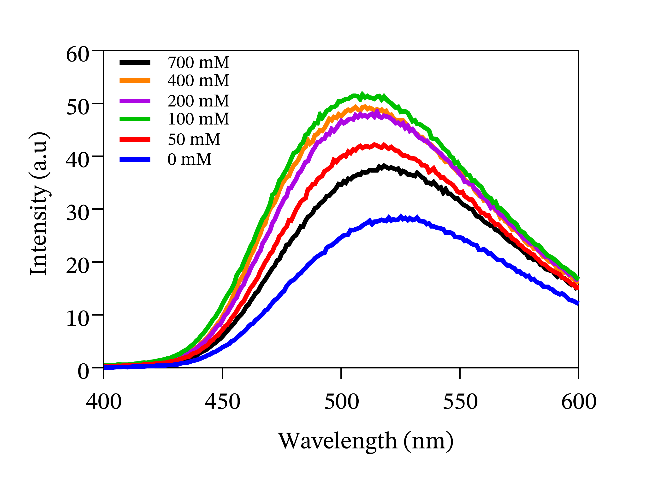
**

**Figure S3. Effect of NaCl on PSM1 in both MQ-water and KPO4-buffer.** (A)Half-time of fibril formation (in hours) derived from ThT fluorescence kinetics at increasing NaCl concentrations (0-700 mM) in MQ-water (white bars) and KPO4-buffer (blue bars). (B**)** ANS fluorescens assay of PSM1 peptide in various NaCl concentrations in MQ-water. (C**)** ANS fluorescence assay of PSM1 peptide in various NaCl concentrations in KPO4 buffer.

**Table S1. ANS fluorescence maxima (λmax) and peak intensities for PSM1 monomers and aggregates in different solution conditions**

|  | Monomers | | Aggregates | |
| --- | --- | --- | --- | --- |
| Solution | λmax (nm) | Peak intensity | λmax (nm) | Peak intensity |
| MQ | 492 | 160.6 ( 6.49) | 508 | 44.4 ( 1.35) |
| KPO4 | 493 | 195.8 (8.2) | 525 | 29.9 ( 1.15) |
| Tris | 483 | 545 (14.9) | 505 | 60.7 (1.03) |
| HEPES | 478 | 133.8 (3.9) | 518 | 39.4 (0.79) |

**Table S2**: **Deconvolution of SRCD spectra of PSM1 monomers and aggregates in different solution conditions.** The distribution of secondary structure elements for both aggregated and monomeric PSM1 in MQ, KPO4, Tris and HEPES buffer.

| Aggregates | | | | |
| --- | --- | --- | --- | --- |
| Buffer | 𝛼-helix | 𝛽-strand | Turns | Unordered |
| MQ | 23.4% | 36.1% | 9.1% | 30.0% |
| KPO4 | 29.5% | 29.6% | 10.0% | 31.0% |
| Tris | 25.3% | 32.6% | 9.6% | 31.9% |
| HEPES | 33.5% | 23.3% | 11.1% | 32.6% |
| Monomers | | | | |
| MQ | 86.6% | 0% | 7.9% | 13.0% |
| KPO4 | 46.5% | 13.0% | 13.0% | 29.0% |
| TRIS | 86.2% | 0% | 8.2% | 7.2% |
| HEPES | 56.1% | 10.2% | 11.8% | 25.1% |

**Table S3: Deconvolution of SRCD spectra of seeded aggregates.** The distribution of secondary structure element for samples cross-seeded with preformed PSMα1 fibrils from different buffers.

|  | 𝛼-helix | 𝛽-strand | Turns | Unordered |
| --- | --- | --- | --- | --- |
| MQ-seeds in MQ | 24.1% | 33.3% | 9.7% | 32.9% |
| MQ-seeds in KPO4 | 18.8% | 31.7% | 10.1% | 39.9% |
| MQ-seeds in Tris | 27.9% | 29.0% | 10.3% | 33.6% |
| MQ-seeds in HEPES | 31.8% | 24.1% | 10.7% | 33.5% |
| KPO4-seeds in MQ | 35.5% | 26.1% | 9.4% | 28.6% |
| KPO4-seeds in KPO4 | 34.1% | 25.5% | 10.4% | 30.0% |
| KPO4-seeds in Tris | 34.8% | 25.7% | 10.1% | 29.5% |
| KPO4-seeds in HEPES | 35.5% | 25.9% | 9.7% | 28.8% |
| Tris-seeds in MQ | 35.0% | 25.2% | 10.6% | 30.0% |
| Tris-seeds in KPO4 | 24.4% | 31.3% | 11.2% | 33.0% |
| Tris-seeds in Tris | 12.9% | 37.2% | 14.9% | 56.9% |
| Tris-seeds in HEPES | 31.9% | 24.9% | 11.3% | 32.5% |
| HEPES-seeds in MQ | 30.2% | 23.0% | 11.8% | 34.9% |
| HEPES-seeds in KPO4 | 31.6% | 23.8% | 11.2% | 34.2% |
| HEPES-seeds in Tris | 33.2% | 18.8% | 12.5% | 36.5% |
| HEPES-seeds in HEPES | 26.6% | 25.9% | 11.5% | 34.8% |

**Table S4: Half-time τ½ of PSM1 fibrils formed in different NaCl concentrations in MQ-and KPO4 buffer**. Aggregation kinetics were monitored at different NaCl concentrations, and the τ½were extracted from kinetic curves. Values represent mean standard deviation from at least two replicates.

| **NaCl (mM)** | τ½ in MQ (min) | τ½ in KPO4 (min) |
| --- | --- | --- |
| 0 | 43.3 (1.13) | 0 () |
| 50 | 24.3 (1.12) | 17 (7.4) |
| 100 | 16.9 (0.13) | 17 (3.64) |
| 400 | 15.3 (0.29) | 13 (0.56) |
| 700 | 17.6(0.22) | 15 (0.36) |

**Table S5: ANS fluorescence peak positions (λmax) and intensities for PSM1 fibrils formed in different NaCl concentrations in MQ-and KPO4 buffer**.

|  | MQ | | KPO4 | |
| --- | --- | --- | --- | --- |
| NaCl (mM) | λmax (nm) | Intensity | λmax (nm) | Intensity |
| 0 | 516 | 44.75 | 516 | 28.6 |
| 50 | 509 | 52.26 | 514 | 42.26 |
| 100 | 501 | 76.63 | 509 | 51.71 |
| 200 | 498 | 60.57 | 515 | 48.47 |
| 400 | 505 | 51.53 | 510 | 49.41 |
| 700 | 515 | 40.99 | 518 | 38.23 |

**Tabel S6: Deconvolution SRCD spectra of PSM1 fibrils formed in different NaCl concentrations in MQ-and KPO4 buffer.** Distribution of secondary structure elements in PSMα1 fibrils from different salt concentrations in MQ-water and KPO4 buffer.

| NaCl (mM) | 𝛼-helix | 𝛽-strand | Turns | Unordered |
| --- | --- | --- | --- | --- |
| **MQ:** | | | | |
| 0 | 31.2% | 31.5% | 9.0% | 27.8% |
| 50 | 34.0% | 27.5% | 9.1% | 28.8% |
| 400 | 38.1% | 24.7% | 9.4% | 28.3% |
| 700 | 35.6% | 25.9% | 9.3% | 29.6% |
| **KPO4** | | | | |
| 0 | 29.1% | 29.9% | 11.4% | 29.2% |
| 50 | 30.4% | 35.7% | 9.9% | 23.9% |
| 400 | 33.6% | 31.9% | 10.2% | 24.1% |
| 700 | 21.4% | 34.0% | 9.1% | 35.0% |
